# Supplementary material for: A Structural View of SARS-CoV-2 RNA Replication Machinery: RNA Synthesis, Proofreading and Final Capping
Source: PubMed Central journal article supplement (PMC7291026; doi:10.3390/cells9051267), 2020-05-20
Supplement: cells-09-01267-s001.pdf [file cells-09-01267-s001.pdf]

## Supplementary Material

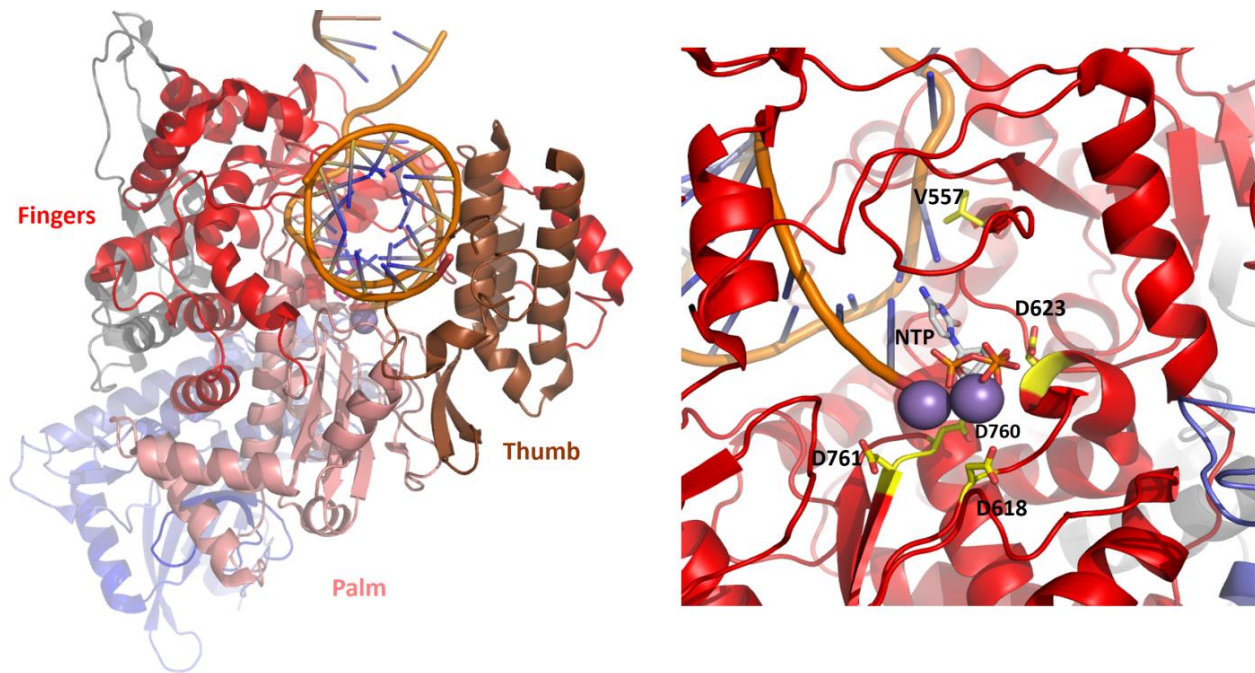

**Figure S1.** Model of SARS-CoV-2 elongation complex; The positions of the RNA template and primer were obtained from the structural alignment of SARS-CoV-2 Nsp12 with the elongation complex of poliovirus (PDB code 3OL6). The position of Mg<sup>2+</sup> ions was taken from the structure of norovirus (PDB code 3H5Y). The three subdomains of the polymerase domain, fingers (residues 366-581 and 621-679), palm (residues 582-620 and 680-815), and the thumb (residues 816-920) are shown in red, salmon and brown, respectively. Right) A zoom of the catalytic site showing the position of the incoming NTP and divalent cations (grey). The conserved Asp residues playing a key role in the NTP and divalent cations binding and Val557 (involved in Remdesivir resistance) are shown as yellow sticks.

**Table S1.** Sequence identities of SARS-CoV2 Nsps with homologous proteins. Identities are reported with homologs from SARS-CoV and MHV. The binary alignments were performed using Lalign Server tool.

| <b>SARS-CoV-2</b> | <b>SARS-CoV</b> | <b>MHV</b> |
|-------------------|-----------------|------------|
| Nsp7              | 98.8            | 43.5       |
| Nsp8              | 97.5            | 45.3       |
| Nsp9              | 97.3            | 46.9       |
| Nsp10             | 97.1            | 52.5       |
| Nsp12             | 96.4            | 66.3       |
| Nsp13             | 99.8            | 67.3       |
| Nsp14             | 95.1            | 82.5       |
| Nsp15             | 88.7            | 44.9       |
| Nsp16             | 93.3            | 63.9       |
